# Supplementary material
Source: PubMed Central journal article supplement (PMC4313225)
Supplement: JCM.01678-14_zjm999093798so1.pdf [file JCM.01678-14_zjm999093798so1.pdf]

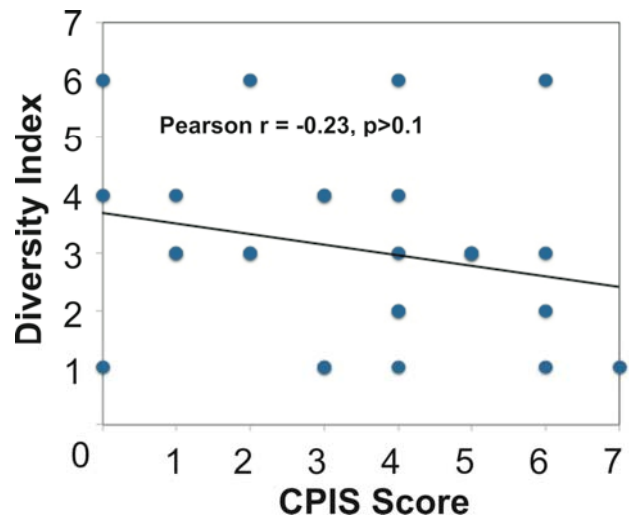

**Supplemental Figure A1.** Relationship between the number of bacterial genera identified by NGS per patient (Diversity Index, Y-axis), versus the CPIS score of the patient defined clinically as a metric of pulmonary distress. The specific bacterial genera identified in each patient is shown in the publication Figure 6 and listed in Supplemental Table 1.
