# Supplementary material
Source: PubMed Central journal article supplement (PMC4313225)
Supplement: JCM.01678-14_zjm999093798so2.pdf [file JCM.01678-14_zjm999093798so2.pdf]

Supplemental Table A1: Bacterial species identified by clinical microbiological and NGS methods

| PHD   | ClinDX                                       | Chimera<br>no. | PathoScope                          |           | BLAST  |                | NGS-DX    |                                     |           |       |       | BLAST   |                |          |
|-------|----------------------------------------------|----------------|-------------------------------------|-----------|--------|----------------|-----------|-------------------------------------|-----------|-------|-------|---------|----------------|----------|
|       |                                              |                | Strain                              | RefSeq-ID | Abund  | Similarity (%) | E-value   | SMRTPortal                          |           |       |       |         | Similarity (%) | E-value  |
|       |                                              |                |                                     |           |        |                |           | Strain                              | RefSeq-ID | Abund | Reads | Cov (X) |                |          |
| 2     | Moderate <i>Acinetobacter baumannii</i>      | 5              | <i>Stenotrophomonas maltophilia</i> | AB294553  | 83.1%  |                | 0.00E+00  | <i>Acinetobacter baumannii</i>      | X81660    | 53.1% | 7933  | 4126.88 |                | 0.00E+00 |
|       |                                              |                | <i>Acinetobacter baumannii</i>      | X81660    | 16.7%  | 86%            |           | <i>Stenotrophomonas maltophilia</i> | AB294553  | 29.8% | 3322  | 2311.87 | 86%            |          |
|       |                                              |                | <i>Achromobacter denitrificans</i>  | AJ278451  | 0.2%   | 85%            |           | <i>Acinetobacter calcoaceticus</i>  | AJ888983  | 3.0%  | 1090  | 231.65  | 97%            |          |
|       |                                              |                |                                     |           |        |                |           | <i>Achromobacter denitrificans</i>  | AJ278451  | 2.9%  | 551   | 222.29  | 83%            |          |
|       |                                              |                |                                     |           |        |                |           | <i>Stenotrophomonas pavanii</i>     | FJ748683  | 2.5%  | 349   | 191.13  | 86%            |          |
|       |                                              |                |                                     |           |        |                |           | <i>Achromobacter xylosoxidans</i>   | Y14908    | 1.6%  | 311   | 125.46  | 83%            |          |
|       |                                              |                |                                     |           |        |                |           | <i>Stenotrophomonas humi</i>        | AM403587  | 1.5%  | 307   | 113     | 85%            |          |
|       |                                              |                | Other                               |           | 0.0%   |                |           | Other                               |           | 5.7%  |       |         |                |          |
| 6     | Moderate <i>Pseudomonas aeruginosa</i>       | 43             | <i>Pseudomonas otitidis</i>         | AY953147  | 98.1%  |                | 0.00E+00  | <i>Pseudomonas otitidis</i>         | AY953147  | 73.2% | 36327 | 27360   |                | 0.00E+00 |
|       |                                              |                | <i>Shigella sonnei</i>              | FR870445  | 1.0%   | 86%            |           | <i>Pseudomonas aeruginosa</i>       | X06684    | 13.9% | 10619 | 5198    | 97%            |          |
|       |                                              |                | <i>Enterobacter cancerogenus</i>    | Z96078    | 0.8%   | 86%            |           | <i>Pseudomonas panipatensis</i>     | EF424401  | 2.5%  | 2732  | 952     | 97%            |          |
|       |                                              |                |                                     |           |        |                |           | <i>Pseudomonas knackmussii</i>      | AF039489  | 2.0%  | 2554  | 748     | 97%            |          |
|       |                                              |                |                                     |           |        |                |           | <i>Pseudomonas sdeltiensis</i>      | DQ339153  | 1.1%  | 1553  | 419     | 96%            |          |
| Other |                                              | 0.1%           |                                     | Other     |        | 7.2%           |           |                                     |           |       |       |         |                |          |
| 10    | Abundant <i>Stenotrophomonas maltophilia</i> | 0              | <i>Stenotrophomonas maltophilia</i> | AB294553  | 100.0% |                |           | <i>Stenotrophomonas maltophilia</i> | AB294553  | 83.6% | 23353 | 16192   |                | 0.00E+00 |
|       |                                              |                |                                     |           |        |                |           | <i>Stenotrophomonas pavanii</i>     | FJ748683  | 5.7%  | 2414  | 1111    | 99%            |          |
|       |                                              |                |                                     |           |        |                |           | <i>Stenotrophomonas humi</i>        | AM403587  | 4.0%  | 1983  | 773     | 98%            |          |
|       |                                              |                |                                     |           |        |                |           | <i>Pseudomonas hibiscicola</i>      | AB021405  | 5.7%  | 2414  | 367     | 99%            |          |
|       |                                              |                |                                     |           |        |                |           | <i>Pseudomonas beteli</i>           | AB021406  | 4.0%  | 1983  | 333     | 99%            |          |
| Other |                                              | 0.0%           |                                     | Other     |        | -3.0%          |           |                                     |           |       |       |         |                |          |
| 12    | Abundant <i>Pseudomonas aeruginosa</i>       | 22             | <i>Acinetobacter baumannii</i>      | X81660    | 84.6%  |                | 0.00E+00  | <i>Acinetobacter baumannii</i>      | X81660    | 56.0% | 19033 | 13737   |                | 0.00E+00 |
|       |                                              |                | <i>Pseudomonas otitidis</i>         | AY953147  | 14.3%  | 88%            |           | <i>Pseudomonas otitidis</i>         | AY953147  | 27.3% | 8489  | 6702    | 88%            |          |
|       |                                              |                | <i>Enterococcus faecalis</i>        | AB012212  | 1.1%   | 81%            |           | <i>Pseudomonas aeruginosa</i>       | X06684    | 6.8%  | 2970  | 1679    | 87%            |          |
|       |                                              |                |                                     |           |        |                |           | <i>Acinetobacter calcoaceticus</i>  | AJ888983  | 2.1%  | 2289  | 519     | 97%            |          |
|       |                                              |                |                                     |           |        |                |           | <i>Pseudomonas knackmussii</i>      | AF039489  | 1.1%  | 622   | 260     | 87%            |          |
| Other |                                              | 0.0%           |                                     | Other     |        | 6.7%           |           |                                     |           |       |       |         |                |          |
| 14    | Moderate yeast                               | 0              | <i>Stenotrophomonas maltophilia</i> | AB294553  | 99.6%  |                | 2.00E-160 | <i>Stenotrophomonas maltophilia</i> | AB294553  | 84.6% | 8359  | 5992    |                | 0.00E+00 |
|       |                                              |                | <i>Phocaeicola abscessus</i>        | EU694176  | 0.3%   | 76%            |           | <i>Stenotrophomonas pavanii</i>     | FJ748683  | 5.8%  | 744   | 413     | 99%            |          |
|       |                                              |                | <i>Achromobacter denitrificans</i>  | AJ278451  | 0.1%   | 85%            |           | <i>Stenotrophomonas humi</i>        | AM403587  | 4.0%  | 861   | 284     | 98%            |          |
|       |                                              |                |                                     |           |        |                |           | <i>Pseudomonas hibiscicola</i>      | AB021405  | 1.9%  | 354   | 137     | 99%            |          |
|       |                                              |                |                                     |           |        |                |           | <i>Pseudomonas beteli</i>           | AB021406  | 1.4%  | 379   | 96      | 99%            |          |
| Other |                                              | 0.0%           |                                     | Other     |        | 2.3%           |           |                                     |           |       |       |         |                |          |
| 19    | Moderate MRSA                                | 1              | <i>Lactobacillus rhamnosus</i>      | D16552    | 48.3%  |                | 0.00E+00  | <i>Enterobacter cancerogenus</i>    | Z96078    | 14.8% | 905   | 752     |                | 0.00E+00 |
|       |                                              |                | <i>Enterobacter cancerogenus</i>    | Z96078    | 19.9%  | 79%            |           | <i>Citrobacter braakii</i>          | AF025368  | 14.3% | 756   | 729     | 98%            |          |
|       |                                              |                | <i>Lactobacillus pontis</i>         | X76329    | 16.5%  | 92%            |           | <i>Citrobacter murlinae</i>         | AF025369  | 7.7%  | 462   | 390     | 98%            |          |
|       |                                              |                | <i>Lactobacillus gasseri</i>        | AF519171  | 7.2%   | 89%            |           | <i>Enterobacter ludwigii</i>        | AJ853891  | 6.5%  | 418   | 329     | 99%            |          |
|       |                                              |                | <i>Achromobacter denitrificans</i>  | AJ278451  | 3.6%   | 79%            |           | <i>Escherichia vulneris</i>         | AF530476  | 5.3%  | 400   | 270     | 98%            |          |
|       |                                              |                | Other                               |           | 4.6%   |                |           | Other                               |           | 51.5% |       |         |                |          |
|       |                                              |                |                                     |           |        |                |           |                                     |           |       |       |         |                |          |
| 43    | Abundant <i>Pseudomonas aeruginosa</i>       | 40             | <i>Pseudomonas otitidis</i>         | AY953147  | 94.6%  |                | 0.00E+00  | <i>Pseudomonas otitidis</i>         | AY953147  | 74.8% | 22045 | 16735   |                | 0.00E+00 |
|       |                                              |                | <i>Gemella haemolysans</i>          | L14326    | 3.2%   | 81%            |           | <i>Pseudomonas aeruginosa</i>       | X06684    | 13.8% | 5808  | 3097    | 97%            |          |
|       |                                              |                | <i>Staphylococcus aureus</i>        | L36472    | 2.1%   | 79%            |           | <i>Pseudomonas panipatensis</i>     | EF424401  | 2.1%  | 1327  | 478     | 97%            |          |
|       |                                              |                |                                     |           |        |                |           | <i>Pseudomonas knackmussii</i>      | AF039489  | 1.7%  | 1214  | 376     | 97%            |          |
|       |                                              |                |                                     |           |        |                |           | <i>Pseudomonas delhiensis</i>       | DQ339153  | 1.0%  | 755   | 221     | 96%            |          |
| Other |                                              | 0.1%           |                                     | Other     |        | 6.6%           |           |                                     |           |       |       |         |                |          |
| 48    | Moderate MRSA                                | 0              | <i>Staphylococcus aureus</i>        | L36472    | 98.3%  |                | 0.00E+00  | <i>Staphylococcus aureus</i>        | L36472    | 59.1% | 515   | 320     |                | 0.00E+00 |
|       |                                              |                | <i>Veillonella parvula</i>          | AY995767  | 0.7%   | 81%            |           | <i>Veillonella parvula</i>          | AY995767  | 11.1% | 110   | 60      | 81%            |          |
|       |                                              |                | <i>Prevotella oulorum</i>           | L16472    | 0.5%   | 73%            |           | <i>Prevotella multiformis</i>       | AB182483  | 8.8%  | 90    | 47      | 73%            |          |
|       |                                              |                | Other                               |           | 0.5%   |                |           | Other                               |           | 21.0% |       |         |                |          |
| 49    | Abundant <i>Pseudomonas aeruginosa</i>       | 11             | <i>Pseudomonas otitidis</i>         | AY953147  | 90.0%  |                | 0.00E+00  | <i>Pseudomonas otitidis</i>         | AY953147  | 73.2% | 2457  | 1971    |                | 0.00E+00 |
|       |                                              |                | <i>Staphylococcus aureus</i>        | L36472    | 4.6%   | 79%            |           | <i>Pseudomonas aeruginosa</i>       | X06684    | 17.0% | 829   | 457     | 97%            |          |
|       |                                              |                | <i>Shigella flexneri</i>            | X96963    | 4.4%   | 86%            |           | <i>Pseudomonas panipatensis</i>     | EF424401  | 2.8%  | 210   | 76      | 97%            |          |

"Table S1: Bacterial species identified by clinical microbiological and NGS methods"

Supplemental Table A1: Bacterial species identified by clinical microbiological and NGS methods

| PHD | ClinDX                                                       | Chimera<br>no. | NGS-DX                                      |              |        |                |           |                                             |              |       |       |         |                |           |          |
|-----|--------------------------------------------------------------|----------------|---------------------------------------------|--------------|--------|----------------|-----------|---------------------------------------------|--------------|-------|-------|---------|----------------|-----------|----------|
|     |                                                              |                | PathoScope                                  |              |        | BLAST          |           | SMRTPortal                                  |              |       |       |         | BLAST          |           |          |
|     |                                                              |                | Strain                                      | RefSeq-ID    | Abund  | Similarity (%) | E-value   | Strain                                      | RefSeq-ID    | Abund | Reads | Cov (X) | Similarity (%) | E-value   |          |
|     |                                                              |                | Other                                       |              | 1.0%   |                |           |                                             | Other        |       | 7.0%  |         |                |           |          |
| 50  | Moderate Enterobacter aerogenes                              | 0              | <i>Raoultella ornithinolytica</i>           | U78182       | 92.2%  |                |           | <i>Raoultella ornithinolytica</i>           | X87276       | 41.5% | 520   | 430     |                |           |          |
|     |                                                              |                | <i>Streptococcus sanguinosus</i>            | AF104678     | 3.7%   | 78%            | 0.00E+00  | <i>Enterobacter aerogenes</i>               | U78182       | 17.0% | 241   | 177     | 99%            | 0.00E+00  |          |
|     |                                                              |                | <i>Prevotella melaninogenica</i>            | CP002122     | 2.2%   | 74%            | 7.00E-126 | <i>Citrobacter murlinae</i>                 | AB004750     | 14.7% | 61    | 152     | 98%            |           |          |
|     |                                                              |                | Other                                       |              | 1.9%   |                |           | Other                                       |              | 26.8% |       |         |                |           |          |
| 53  | Abundant Enterobacter aerogenes                              | 4              | <i>Enterobacter aerogenes</i>               | AB004750     | 100.0% |                |           | <i>Citrobacter murlinae</i>                 | U78182       | 37.4% | 10161 | 8620    |                |           |          |
|     |                                                              |                |                                             |              |        |                |           | <i>Raoultella ornithinolytica</i>           | AB004750     | 16.3% | 4911  | 3765    | 99%            | 0.00E+00  |          |
|     |                                                              |                |                                             |              |        |                |           | <i>Enterobacter aerogenes</i>               | AF025369     | 13.1% | 3860  | 3007    | 98%            |           |          |
|     |                                                              |                | Other                                       |              | 0.0%   |                |           | Other                                       |              | 33.2% |       |         |                |           |          |
| 54  | Few Pseudomonas aeruginosa                                   | 28             | <i>Pseudomonas otitidis</i>                 | AY953147     | 100.0% |                |           | <i>Pseudomonas otitidis</i>                 | AY953147     | 79.0% | 313   | 219     |                |           | 0.00E+00 |
|     |                                                              |                |                                             |              |        |                |           | <i>Pseudomonas aeruginosa</i>               | X06684       | 21.0% | 123   | 57      | 97%            |           |          |
|     |                                                              |                | Other                                       |              | 100.0% |                |           | Other                                       |              | 0.0%  |       |         |                |           |          |
| 61  | Moderate oropharyngeal flora                                 | 1              | <i>Achromobacter denitrificans</i>          | AJ278451     | 58.7%  |                |           | <i>Achromobacter denitrificans</i>          | AJ278451     | 46.2% | 2933  | 1611    |                |           |          |
|     |                                                              |                | <i>Enterococcus duras</i>                   | AJ276354     | 35.6%  | 78%            | 0.00E+00  | <i>Achromobacter xylosoxidans</i>           | Y14908       | 19.1% | 1285  | 667     | 99%            | 0.00E+00  |          |
|     |                                                              |                | <i>Pseudomonas migulae</i>                  | AF074383     | 3.7%   | 84%            |           | <i>Achromobacter insolitus</i>              | AY170847     | 7.0%  | 510   | 243     | 99%            |           |          |
|     |                                                              |                | <i>Stenotrophomonas maltophilia</i>         | AB294553     | 1.3%   | 85%            |           | <i>Achromobacter spanius</i>                | AY170848     | 6.3%  | 405   | 219     | 99%            |           |          |
|     |                                                              |                | Other                                       |              | 0.7%   |                |           | Other                                       |              | 21.4% |       |         |                |           |          |
| 64  | Moderate Pseudomonas aeruginosa, Few Acinetobacter baumannii | 9              | <i>Prevotella melaninogenica</i>            | CP002122     | 79.6%  |                |           | <i>Prevotella melaninogenica</i>            | AY995767     | 61.1% | 15173 | 9188    |                |           |          |
|     |                                                              |                | <i>Lactobacillus gasseri</i>                | AF519171     | 9.3%   | 76%            | 1.00E-170 | <i>Acinetobacter baumannii</i>              | CP002122     | 10.0% | 2578  | 1499    | 76%            | 1.00E-160 |          |
|     |                                                              |                | <i>Acinetobacter baumannii</i>              | X81660       | 6.6%   | 76%            | 1.00E-160 | <i>Pseudomonas otitidis</i>                 | FJ545434     | 7.0%  | 1542  | 1055    | 74%            | 2.00E-159 |          |
|     |                                                              |                | <i>Veillonella parvula</i>                  | AY995767     | 2.5%   | 74%            | 5.00E-135 | <i>Veillonella parvula</i>                  | AY953147     | 4.5%  | 1240  | 677     | 74%            | 4.00E-135 |          |
|     |                                                              |                | <i>Pseudomonas otitidis</i>                 | AY953147     | 1.5%   | 74%            | 2.00E-159 | <i>Prevotella scopos</i>                    | X81660       | 1.6%  | 881   | 234     | 98%            | 0.00E+00  |          |
|     |                                                              |                | Other                                       |              | 0.5%   |                |           | Other                                       |              | 15.9% |       |         |                |           |          |
| 67  | Few oropharyngeal flora                                      | 0              | <i>Obesumbacterium proteus</i>              | AJ233422     | 54.2%  |                |           | <i>Acinetobacter baumannii</i>              | X81660       | 45.1% | 9     | 6       |                |           |          |
|     |                                                              |                | <i>Achromobacter denitrificans</i>          | AJ278451     | 31.4%  | 82%            | 0.00E+00  | <i>Bacteroides intestinalis</i>             | AB214328     | 13.4% | 3     | 2       | 77%            | 0.00E+00  |          |
|     |                                                              |                | <i>Pseudomonas otitidis</i>                 | AY953147     | 10.8%  | 86%            |           | <i>Lactobacillus gasseri</i>                | AF519171     | 9.5%  | 5     | 1       | 80%            |           |          |
|     |                                                              |                | <i>Streptococcus mitis</i>                  | AF003929     | 3.5%   | 78%            |           | <i>Prevotella melaninogenica</i>            | CP002122     | 8.9%  | 6     | 1       | 76%            | 1.00E-163 |          |
|     |                                                              |                | Other                                       |              | 0.1%   |                |           | Other                                       |              | 23.1% |       |         |                |           |          |
| 70  | Abundant oropharyngeal flora                                 | 6              | <i>Neisseria cinerea</i>                    | ACDY02000019 | 96.4%  |                |           | <i>Neisseria cinerea</i>                    | ACDY02000019 | 62.0% | 15690 | 10515   |                |           |          |
|     |                                                              |                | <i>Streptococcus mitis</i>                  | AF003929     | 1.8%   | 78%            | 0.00E+00  | <i>Neisseria sicca</i>                      | ACKO02000016 | 14.4% | 5200  | 2448    | 97%            |           |          |
|     |                                                              |                | <i>Corynebacterium pseudodiphtheriticum</i> | AJ439343     | 1.6%   | 79%            |           | <i>Corynebacterium pseudodiphtheriticum</i> | AJ439343     | 7.1%  | 2262  | 1202    | 79%            | 0.00E+00  |          |
|     |                                                              |                |                                             |              |        |                |           | <i>Neisseria flavescens</i>                 | L06168       | 3.8%  | 2158  | 645     | 97%            |           |          |
|     |                                                              |                |                                             |              |        |                |           | <i>Streptococcus mitis</i>                  | AF003929     | 2.5%  | 704   | 430     | 78%            |           |          |
|     |                                                              |                | Other                                       |              | 0.1%   |                |           | Other                                       |              | 10.2% |       |         |                |           |          |
| 71  | Abundant MRSA                                                | 3              | <i>Staphylococcus aureus</i>                | L36472       | 99.8%  |                |           | <i>Staphylococcus aureus</i>                | L36472       | 80.2% | 13572 | 8890    |                |           |          |
|     |                                                              |                | <i>Enterococcus faecalis</i>                | AB012212     | 0.2%   | 89%            | 0.00E+00  | <i>Staphylococcus aureus</i>                | D83355       | 5.3%  | 951   | 592     | 99%            | 0.00E+00  |          |
|     |                                                              |                |                                             |              |        |                |           | <i>Staphylococcus simiae</i>                | AY727530     | 4.6%  | 1009  | 512     | 99%            |           |          |
|     |                                                              |                |                                             |              |        |                |           | <i>Enterococcus faecalis</i>                | AB012212     | 4.4%  | 823   | 490     | 89%            |           |          |
|     |                                                              |                | Other                                       |              | 0.0%   |                |           | Other                                       |              | 5.4%  |       |         |                |           |          |
| 73  | Abundant Aeromonas hydrophila, Abundant Pantoea species      | 20             | <i>Aeromonas punctata</i>                   | X60408       | 92.5%  |                |           | <i>Serratia grimesii</i>                    | AJ233430     | 12.4% | 3109  | 2792    |                |           |          |
|     |                                                              |                | <i>Serratia grimesii</i>                    | AJ233430     | 2.1%   | 91%            | 0.00E+00  | <i>Dysgonomonas capnocytophagoides</i>      | U41355       | 9.8%  | 4321  | 2192    | 74%            | 2.00E-126 |          |
|     |                                                              |                | <i>Streptococcus salivarius</i>             | AY188352     | 1.6%   | 78%            |           | <i>Yersinia entomophaga</i>                 | DQ400782     | 9.3%  | 2887  | 2085    | 96%            |           |          |
|     |                                                              |                | <i>Dysgonomonas capnocytophagoides</i>      | U41355       | 1.5%   | 76%            | 1.00E-162 | <i>Aeromonas punctata</i>                   | X60408       | 5.7%  | 1596  | 1274    | 91%            | 0.00E+00  |          |
|     |                                                              |                | <i>Pseudomonas extremaustralis</i>          | AJ583501     | 1.0%   | 89%            | 0.00E+00  | <i>Aeromonas hydrophila</i>                 | FR870443     | 5.3%  | 2697  | 1193    | 91%            |           |          |
|     |                                                              |                | <i>Stenotrophomonas maltophilia</i>         | AB294553     | 1.0%   | 86%            |           | <i>Hafnia paralvei</i>                      | FM179943     | 5.3%  | 1678  | 1192    | 98%            |           |          |
|     |                                                              |                | Other                                       |              | 0.3%   |                |           | Other                                       |              | 52.3% |       |         |                |           |          |
| 75  | Moderate yeast                                               | 0              | <i>Pseudomonas otitidis</i>                 | AY953147     | 99%    |                |           | <i>Pseudomonas otitidis</i>                 | AY953147     | 0.834 | 695   | 539     |                |           |          |
|     |                                                              |                | <i>Achromobacter denitrificans</i>          | AJ278451     | 1.0%   | 84%            | 0.00E+00  | <i>Pseudomonas aeruginosa</i>               | X06684       | 12.0% | 167   | 78      | 97%            | 0.00E+00  |          |
|     |                                                              |                |                                             |              |        |                |           | <i>Pseudomonas panipatensis</i>             | EF424401     | 2.9%  | 53    | 19      | 97%            |           |          |
|     |                                                              |                |                                             |              |        |                |           | <i>Pseudomonas knackmussii</i>              | AF039489     | 1.7%  | 55    | 11      | 97%            |           |          |
|     |                                                              |                | Other                                       |              | 0.0%   |                |           | Other                                       |              | 0.0%  |       |         |                |           |          |

"Table S1: Bacterial species identified by clinical microbiological and NGS methods"

Supplemental Table A1: Bacterial species identified by clinical microbiological and NGS methods

| PHD                             | ClinDX                                                                          | Chimera<br>no. | PathoScope                        |                         | BLAST |                                    | NGS-DX                            |                                       |              |       |          | BLAST                              |                |          |                |
|---------------------------------|---------------------------------------------------------------------------------|----------------|-----------------------------------|-------------------------|-------|------------------------------------|-----------------------------------|---------------------------------------|--------------|-------|----------|------------------------------------|----------------|----------|----------------|
|                                 |                                                                                 |                | Strain                            | RefSeq-ID               | Abund | Similarity (%)                     | E-value                           | SMRTPortal                            |              |       |          |                                    | Similarity (%) | E-value  |                |
|                                 |                                                                                 |                |                                   |                         |       |                                    |                                   | Strain                                | RefSeq-ID    | Abund | Reads    | Cov (X)                            |                |          | Similarity (%) |
| 77                              | Few <i>Moraxella catarrhalis</i> ,<br>Few oropharyngeal flora                   | 1              | <i>Staphylococcus aureus</i>      | L36472                  | 79.5% |                                    | 0.00E+00                          | <i>Streptococcus mitis</i>            | AF003929     | 12.1% | 188      | 55                                 |                | 0.00E+00 |                |
|                                 |                                                                                 |                | <i>Streptococcus mitis</i>        | AF003929                | 13.5% | 86%                                |                                   | <i>Moraxella catarrhalis</i>          | AF005185     | 9.5%  | 182      | 43                                 | 79%            |          |                |
|                                 |                                                                                 |                | <i>Moraxella catarrhalis</i>      | AF005185                | 2.3%  | 79%                                |                                   | <i>Shewanella donghaensis</i>         | AY326275     | 5.7%  | 611      | 26                                 | 78%            |          |                |
|                                 |                                                                                 |                | <i>Corynebacterium accolens</i>   | AJ439346                | 1.1%  | 79%                                |                                   | <i>Desulfovibrio piger</i>            | AF192152     | 5.7%  | 693      | 26                                 | 79%            |          |                |
|                                 |                                                                                 |                | Other                             |                         | 3.6%  |                                    |                                   | Other                                 |              | 67.0% |          |                                    |                |          |                |
| 78                              | Few <i>Enterobacter aerogenes</i>                                               | 12             | <i>Streptococcus mitis</i>        | AF003929                | 75.1% |                                    | 0.00E+00                          | <i>Streptococcus mitis</i>            | AF003929     | 16.4% | 3277     | 2050                               |                | 0.00E+00 |                |
|                                 |                                                                                 |                | <i>Haemophilus influenzae</i>     | M35019                  | 4.8%  | 77%                                |                                   | <i>Corynebacterium accolens</i>       | AJ439346     | 14.3% | 3159     | 1788                               | 79%            |          |                |
|                                 |                                                                                 |                | <i>Streptococcus anginosus</i>    | AF104678                | 3.9%  | 93%                                |                                   | <i>Neisseria cinerea</i>              | ACDY02000019 | 8.5%  | 1567     | 1058                               | 78%            |          |                |
|                                 |                                                                                 |                | <i>Gemella haemolysans</i>        | L14326                  | 3.5%  | 85%                                |                                   | <i>Streptococcus anginosus</i>        | AF104678     | 6.4%  | 1494     | 799                                | 93%            |          |                |
|                                 |                                                                                 |                | <i>Streptococcus intermedius</i>  | AF104671                | 3.4%  | 95%                                |                                   | <i>Prevotellamela ninogenica</i>      | CP002122     | 4.1%  | 1080     | 508                                | 76%            |          | 6.00E-166      |
|                                 |                                                                                 |                | <i>Corynebacterium accolens</i>   | AJ439346                | 2.6%  | 79%                                |                                   | <i>Streptococcus pneumoniae</i>       | AF003930     | 3.6%  | 902      | 456                                | 99%            |          | 0.00E+00       |
|                                 |                                                                                 |                | <i>Staphylococcus epidermidis</i> | D83363                  | 2.2%  | 85%                                |                                   | <i>Streptococcus intermedius</i>      | AF104671     | 3.5%  | 727      | 433                                | 95%            |          |                |
|                                 |                                                                                 |                | <i>Neisseria flavescens</i>       | L06168                  | 2.0%  | 78%                                |                                   | <i>Haemophilus parainfluenzae</i>     | AY362908     | 3.2%  | 822      | 406                                | 79%            |          |                |
|                                 |                                                                                 |                | <i>Neisseria sicca</i>            | ACKO02000016            | 1.2%  | 80%                                |                                   | <i>Haemophilus pittmaniae</i>         | AJ290755     | 2.8%  | 394      | 355                                | 77%            |          |                |
|                                 |                                                                                 |                | Other                             |                         | 1.3%  |                                    |                                   | Other                                 |              | 37.2% |          |                                    |                |          |                |
|                                 |                                                                                 |                | 80                                | Few oropharyngeal flora | 0     | <i>Achromobacter denitrificans</i> |                                   | AJ278451                              | 96.7%        |       | 0.00E+00 | <i>Achromobacter denitrificans</i> | AJ278451       |          | 41.3%          |
| <i>Pseudomonas otitidis</i>     | AY953147                                                                        | 1.5%           |                                   |                         |       | 84%                                | <i>Achromobacter xylosoxidans</i> | Y14908                                | 13.6%        | 143   |          | 84                                 | 94%            |          |                |
| <i>Streptococcus pneumoniae</i> | AF003930                                                                        | 1.2%           |                                   |                         |       | 78%                                | <i>Pseudomonas otitidis</i>       | AY953147                              | 5.9%         | 48    |          | 36                                 | 84%            |          |                |
|                                 |                                                                                 |                |                                   |                         |       |                                    | <i>Achromobacter insolitus</i>    | AY170847                              | 4.3%         | 54    |          | 27                                 | 99%            |          |                |
| Other                           |                                                                                 | 0.6%           |                                   |                         |       |                                    | Other                             |                                       | 34.9%        |       |          |                                    |                |          |                |
| 83                              | Few <i>Enterobacter cloacae</i>                                                 |                | <i>Enterobacter ludwigii</i>      | AJ853891                | 80.2% |                                    | 0.00E+00                          | <i>Enterobacter ludwigii</i>          | AJ853891     | 40.8% | 5495     | 4471                               |                | 0.00E+00 |                |
|                                 |                                                                                 |                | <i>Veillonella parvula</i>        | AY995767                | 6.1%  | 79%                                |                                   | <i>Acinetobacter guillouiae</i>       | X81659       | 12.8% | 1834     | 1400                               | 85%            |          |                |
|                                 |                                                                                 |                | <i>Acinetobacter guillouiae</i>   | X81659                  | 5.7%  | 85%                                |                                   | <i>Porphyromonas catoniae</i>         | X82823       | 5.4%  | 903      | 596                                | 76%            |          | 6.00E-166      |
|                                 |                                                                                 |                | <i>Enterococcus faecalis</i>      | AB012212                | 2.6%  | 78%                                |                                   | <i>Actinomyces odontolyticus</i>      | AJ234040     | 5.4%  | 736      | 594                                | 79%            |          | 0.00E+00       |
|                                 |                                                                                 |                | <i>Streptococcus pneumoniae</i>   | AF003930                | 2.0%  | 77%                                |                                   | <i>Veillonella parvula</i>            | AY995767     | 5.1%  | 876      | 558                                | 79%            |          |                |
|                                 |                                                                                 |                | <i>Klebsiella pneumoniae</i>      | X87276                  | 1.9%  | 98%                                |                                   | <i>Acinetobacter bereziniae</i>       | Z93443       | 4.8%  | 911      | 522                                | 85%            |          |                |
|                                 |                                                                                 |                | <i>Lautropia mirabilis</i>        | AEQP01000026            | 1.1%  | 83%                                |                                   | <i>Abiotrophia defectiva</i>          | D50541       | 2.8%  | 436      | 309                                | 78%            |          |                |
|                                 |                                                                                 |                | Other                             |                         | 0.5%  |                                    |                                   | Other                                 |              | 23.0% |          |                                    |                |          |                |
| 85                              | Moderate MSSA                                                                   |                | <i>Lactobacillus gasseri</i>      | AF519171                | 54.8% |                                    | 0.00E+00                          | <i>Streptococcus salivarius</i>       | AY188352     | 46.2% | 1710     | 1148                               |                | 0.00E+00 |                |
|                                 |                                                                                 |                | <i>Streptococcus salivarius</i>   | AY188352                | 35.6% | 85%                                |                                   | <i>Streptococcus mitis</i>            | AF003929     | 11.0% | 369      | 274                                | 95%            |          |                |
|                                 |                                                                                 |                | <i>Gemella morbillorum</i>        | L14327                  | 4.6%  | 85%                                |                                   | <i>Prevotella histicola</i>           | EU126661     | 6.6%  | 250      | 164                                | 76%            |          | 3.00E-154      |
|                                 |                                                                                 |                | <i>Streptococcus mutans</i>       | AY188348                | 2.6%  | 86%                                |                                   | <i>Streptococcus vestibularis</i>     | AY188353     | 5.0%  | 285      | 123                                | 99%            |          | 0.00E+00       |
|                                 |                                                                                 |                | Other                             |                         | 2.4%  |                                    |                                   | Other                                 |              | 31.2% |          |                                    |                |          |                |
| 86                              | Abundant MSSA                                                                   |                | <i>Staphylococcus aureus</i>      | L36472                  | 47.9% |                                    | 0.00E+00                          | <i>Haemophilus influenzae</i>         | M35019       | 56.2% | 6829     | 3879                               |                | 0.00E+00 |                |
|                                 |                                                                                 |                | <i>Haemophilus influenzae</i>     | M35019                  | 27.5% | 78%                                |                                   | <i>Streptococcus mitis</i>            | AF003929     | 13.0% | 1778     | 900                                | 77%            |          |                |
|                                 |                                                                                 |                | <i>Streptococcus pneumoniae</i>   | AF003930                | 22.4% | 85%                                |                                   | <i>Streptococcus pneumoniae</i>       | AF003930     | 11.6% | 1300     | 804                                | 78%            |          |                |
|                                 |                                                                                 |                | <i>Raoultella ornithinolytica</i> | U78182                  | 1.6%  | 79%                                |                                   | <i>Haemophilus aegyptius</i>          | AY362905     | 6.2%  | 1031     | 431                                | 99%            |          |                |
|                                 |                                                                                 |                |                                   |                         |       |                                    |                                   | <i>Streptococcus pseudopneumoniae</i> | AY612844     | 5.8%  | 773      | 399                                | 78%            |          |                |
|                                 |                                                                                 |                |                                   |                         |       |                                    |                                   | <i>Staphylococcus aureus</i>          | L36472       | 1.6%  | 200      | 113                                | 78%            |          |                |
|                                 |                                                                                 |                | Other                             |                         | 0.6%  |                                    |                                   | Other                                 |              | 5.5%  |          |                                    |                |          |                |
| 89                              | Moderate <i>Klebsiella pneumoniae</i> ,<br>Moderate <i>Providencia stuartii</i> |                | <i>Streptococcus agalactiae</i>   | AB023574                | 72.2% |                                    | 0.00E+00                          | <i>Streptococcus agalactiae</i>       | AB023574     | 66.8% | 22695    | 15220                              |                | 0.00E+00 |                |
|                                 |                                                                                 |                | <i>Lactobacillus gasseri</i>      | AF519171                | 11.4% | 87%                                |                                   | <i>Klebsiella pneumoniae</i>          | X87276       | 13.5% | 4181     | 3069                               | 78%            |          |                |
|                                 |                                                                                 |                | <i>Streptococcus anginosus</i>    | AF104678                | 7.5%  | 93%                                |                                   | <i>Streptococcus anginosus</i>        | AF104678     | 8.8%  | 3184     | 1999                               | 93%            |          |                |
|                                 |                                                                                 |                | <i>Klebsiella pneumoniae</i>      | X87276                  | 6.5%  | 78%                                |                                   | <i>Klebsiella pneumoniae</i>          | AF130982     | 1.7%  | 694      | 388                                | 78%            |          |                |
|                                 |                                                                                 |                |                                   |                         |       |                                    |                                   | <i>Enterococcus faecalis</i>          | AB012212     | 1.6%  | 641      | 356                                | 89%            |          |                |

Supplemental Table A1: Bacterial species identified by clinical microbiological and NGS methods

| PHD | ClinDX                    | Chimera no. | NGS-DX                             |           |       |                |          |        |                                  |                              |        |         |                |         |       |  |  |  |          |
|-----|---------------------------|-------------|------------------------------------|-----------|-------|----------------|----------|--------|----------------------------------|------------------------------|--------|---------|----------------|---------|-------|--|--|--|----------|
|     |                           |             | PathoScope                         |           |       | BLAST          |          |        | SMRTPortal                       |                              |        |         | BLAST          |         |       |  |  |  |          |
|     |                           |             | Strain                             | RefSeq-ID | Abund | Similarity (%) | E-value  | Strain | RefSeq-ID                        | Abund                        | Reads  | Cov (X) | Similarity (%) | E-value |       |  |  |  |          |
|     |                           |             |                                    |           |       |                |          |        |                                  |                              |        |         |                |         |       |  |  |  |          |
|     |                           |             | Other                              |           |       | 2.3%           |          |        |                                  | <i>Klebsiella pneumoniae</i> | Y17657 | 1.2%    | 451            | 271     | 78%   |  |  |  |          |
|     |                           |             | Other                              |           |       |                |          |        |                                  | Other                        |        |         |                | 6.5%    |       |  |  |  |          |
| 90  | Standard culture negative |             | <i>Lactobacillus gasseri</i>       | AF519171  | 41.5% |                |          |        | <i>Enterobacter cancerogenus</i> | Z96078                       | 14.1%  | 479     | 397            |         |       |  |  |  |          |
|     |                           |             | <i>Lactobacillus rhamnosus</i>     | D16552    | 38.9% | 89%            |          |        | <i>Citrobacter braakii</i>       | AF025368                     | 13.0%  | 402     | 368            | 98%     |       |  |  |  |          |
|     |                           |             | <i>Enterobacter cancerogenus</i>   | Z96078    | 4.4%  | 81%            |          |        | <i>Citrobacter murlinae</i>      | AF025369                     | 8.1%   | 263     | 228            | 98%     |       |  |  |  |          |
|     |                           |             | <i>Pseudomonas otitidis</i>        | AY953147  | 3.3%  | 81%            |          |        | <i>Enterobacter ludwigii</i>     | AJ853891                     | 7.2%   | 262     | 204            | 99%     |       |  |  |  |          |
|     |                           |             | <i>Streptococcus anginosus</i>     | AF104678  | 2.5%  | 86%            | 0.00E+00 |        | <i>Citrobacter werkmanii</i>     | AF025373                     | 5.6%   | 273     | 158            | 98%     |       |  |  |  | 0.00E+00 |
|     |                           |             | <i>Streptococcus agalactiae</i>    | AB023574  | 2.5%  | 87%            |          |        | <i>Escherichia vulneris</i>      | AF530476                     | 5.0%   | 205     | 142            | 98%     |       |  |  |  |          |
|     |                           |             | <i>Streptococcus pneumoniae</i>    | AF003930  | 2.3%  | 85%            |          |        | <i>Lactobacillus rhamnosus</i>   | D16552                       | 4.5%   | 176     | 126            | 79%     |       |  |  |  |          |
|     |                           |             | <i>Shigella flexneri</i>           | X96963    | 2.2%  | 81%            |          |        | <i>Citrobacter freundii</i>      | AJ233408                     | 3.9%   | 130     | 109            | 98%     |       |  |  |  |          |
|     |                           |             | <i>Haemophilus influenzae</i>      | M35019    | 1.1%  | 79%            |          |        | <i>Haemophilus influenzae</i>    | M35019                       | 3.8%   | 160     | 108            | 87%     |       |  |  |  |          |
|     |                           |             | <i>Achromobacter denitrificans</i> | AJ278451  | 1.0%  | 79%            |          |        | <i>Salmonella enterica</i>       | AE006468                     | 3.2%   | 141     | 90             | 97%     |       |  |  |  |          |
|     |                           |             |                                    |           | Other |                |          | 0.4%   |                                  |                              | Other  |         |                |         | 31.6% |  |  |  |          |

Average CHIMERA /sample 9

Average (No. Reads/Cov per sample)

2739 1662
